# Supplementary material for: A turn-on near-infrared fluorescent chemosensor for selective detection of lead ions based on a fluorophore–gold nanoparticle assembly
Source: Royal Society of Chemistry journal article supplement (doi:10.1039/c5an00320b), 2015-01-01
Supplement: c5an00320b1.pdf [file c5an00320b1.pdf]

## Supporting Information

### **A turn-on near-infrared fluorescent chemosensor for selective detection of lead ion based on fluophors-gold nanoparticles assembly**

**Shaozhen Wang,<sup>\*a</sup> Junyong Sun,<sup>b</sup> and Feng Gao<sup>\*b</sup>**

*<sup>a</sup>Department of Pharmacy, Wannan Medical College, Wuhu 241002, P. R. China. E-mail:shaozhenwang@hotmail.com.*

*<sup>b</sup>Anhui Key Laboratory of Chemo/Biosensing, College of Chemistry and Materials Science, Anhui Normal University, Wuhu 241000, P. R. China. E-mail:fgao@mail.ahnu.edu.cn.*

\*To whom correspondence should be addressed.

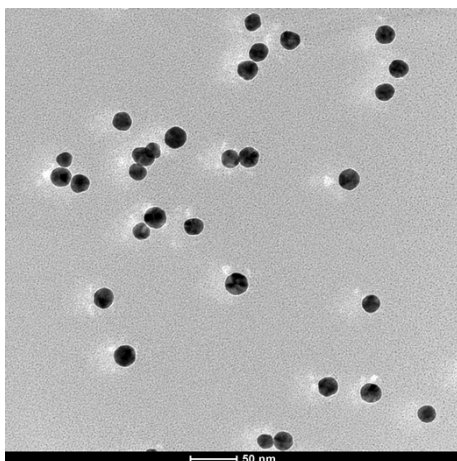

**Fig. S1** TEM images of Au Nanoparticles.

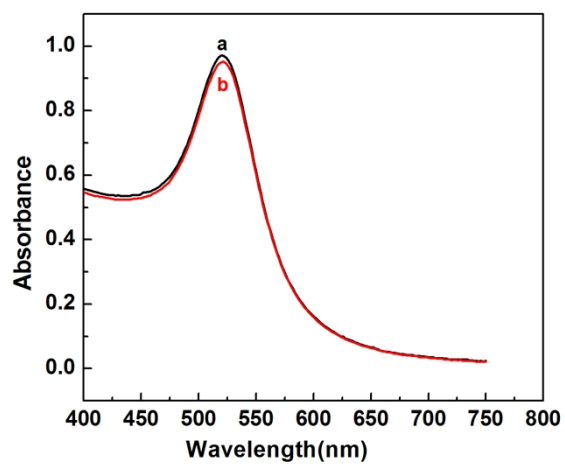

**Fig. S2** (a) Absorption spectra of pure Au Nanoparticles (red line), (b) absorption spectra of GSH-Au NPs (black line).

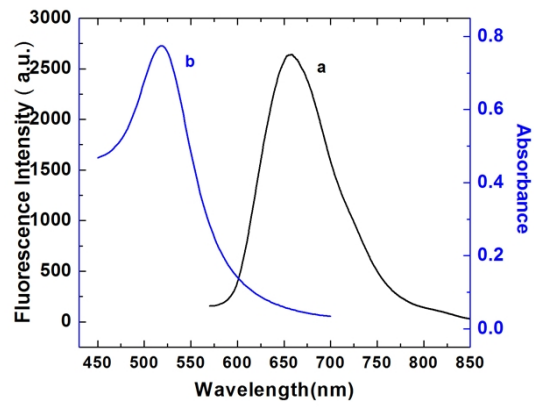

**Fig. S3** (a) Fluorescence emission spectra of BCB(black line) at an excitation of 520 nm, and (b) absorption spectra of AuNPs(blue line).

**Table S1** Comparison of analytical parameters of different methods for the determination of Pb<sup>2+</sup>

| Methods                                                                                                                               | Linear range<br>/ $\mu\text{M}$ | Detection limit<br>/ nM | Ref.      |
|---------------------------------------------------------------------------------------------------------------------------------------|---------------------------------|-------------------------|-----------|
| Colorimetric filtrations / metal chelate precipitations                                                                               | 0-10                            | 3000                    | 1         |
| DPASV/Silver nanonuts modified glassy carbon electrode                                                                                | 1.8-324                         | 0.54                    | 2         |
| LA-ICP-MS / dried blood spot on a filter membrane                                                                                     | 0-1.8                           | 0.36                    | 3         |
| DPASV / tubular bismuth-film electrodes                                                                                               | 1.1-35                          | 0.72                    | 4         |
| LPME-SFO / undecanoic acid (UA)                                                                                                       | 0.0018-0.028                    | 0.036                   | 5         |
| SWASV/digesting fish tissue with hydrogen peroxide/hydrochloric acid mixture---solid phase (SP) purification of the digested material | 0.0036-3.6                      | 1.1                     | 6         |
| DPASV/Flow manifold of the sequential injection lab-on-valve (LOV) system with an integrated electrochemical flow cell                | 0.0036-0.36                     | 1.5                     | 7         |
| DPASV/Nanocrystalline Boron-Doped Diamond Electrode                                                                                   | 0.02-0.28                       |                         | 8         |
| ASV/the inducing adsorption ability of I <sup>-</sup>                                                                                 | 0.02-4                          | 6                       | 9         |
| Fluorimetry/ GO-DNAzyme based biosensor                                                                                               | 0.001-1                         | 0.3                     | 10        |
| Fluorimetry/ G-quadruplex DNAzyme                                                                                                     | 0-1                             | 1.0                     | 11        |
| Fluorimetry/ QDs- AuNPs                                                                                                               | 0.8-20                          | 100                     | 12        |
| Fluorimetry/ssDNA-SWCNT                                                                                                               | 0.005-10                        | 1                       | 13        |
| Fluorimetry/ DNAzyme-Pb <sup>2+</sup>                                                                                                 | 0.001-1                         |                         | 14        |
| Fluorimetry/ rhodamine–phenylurea conjugate                                                                                           | 0-0.007                         | 7                       | 15        |
| Fluorimetry/ DNA duplex-quadruplex exchange                                                                                           | 0.02-1                          | 20                      | 16        |
| Fluorimetry/ Abasic Site-Containing DNAzyme and Aptamer                                                                               | 0-1                             | 4                       | 17        |
| Fluorimetry/ Ag nanorods (AgNR)-Rhodamine 6G (R6G)                                                                                    | 20-60                           | 180                     | 18        |
| Fluorimetry/ glutathione modified AuNDs                                                                                               | 0.005-5                         | 2                       | 19        |
| DPASV/amine functionalized graphene oxide                                                                                             | 0.5-50                          | 0.0001                  | 20        |
| flow cytometric/DNAzyme                                                                                                               | 0.001-0.1                       | 0.6                     | 21        |
| sectrophotometric/unimolecular G-quadruplex peroxidase-like DNAzyme (PW17)                                                            | 0.05-1.2                        | 27                      | 22        |
| Fluorimetry/BCB-Au NPs                                                                                                                | 0.00075-0.01                    | 0.51                    | This Work |

DPASV, Differential pulse anodic stripping voltammetry; LA-ICP-MS, laser ablation coupled with inductively coupled plasma mass spectrometry; LPME-SFO, liquid phase microextraction by solidification of a floating organic droplet; SWASV, square wave anodic stripping voltammetry; ASV, anodic stripping voltammetry.

**Ref.**

- 1 L. Feng, Y. Zhang, L. Y. Wen, L. Chen, Z. Shen, Y. F. Guan, *Analyst*, 2011, **136**, 4197-4203.
- 2 S. Prakash, V. K. Shahi, *Anal. Methods*, 2011, **3**, 2134-2139.
- 3 H. F. Hsieh, W. S. Chang, Y. K. Hsieh, C. F. Wang, *Talanta*, 2009, **79**, 183-188.
- 4 J. A. Rodriguez, I. S. Ibarra, C. A. Galan-Vidal, and M. Vega, et al., *Electroanalysis*, 2009, **21**, 452-458.
- 5 R. E. Rivas, I. L. Garcí'a , M. H. Cordoba, *Anal. Methods*, 2010, **2**, 225-230.
- 6 V. Meucci, S. Laschi, M. Minunni, and C. Pretti, et al., *Talanta*, 2009, **77**, 1143-1148.
- 7 Y. Wang, Z. Q. Liu, X. Y. Hu, J. L. Cao, F. Wang, Q. Xu, C. Yang, *Talanta*, 2009, **77**, 1203-1207.
- 8 O. E. Tall, N. J. Renault, M. Sigaud, O. Vittori, *Electroanalysis*, 2007, **19**, 1152-1159.

- 9 G. Li, Z. M. Ji, K. B. Wu, *Anal. Chim. Acta*, 2006, **577**,178-182.
- 10 X. H. Zhao, R. M. Kong, X. B. Zhang, and H. M. Meng, et al., *Anal. Chem.*, 2011, **83**, 5062-5066.
- 11 C. L. Li, K. T. Liu, Y. W. Lin, H. T. Chang, *Anal. Chem.*, 2011, **83**, 225-230.
- 12 X. Wang , X. Q. Guo, *Analyst*, 2009, **134**, 1348-1354.
- 13 J. J. Yao, J. S. Li, J. Owens, W. W. Zhong, *Analyst*, 2011, **136**, 764-768.
- 14 M. Y. Liu, X. H. Lou, J. Du, M. Guan, J. Wang, X. F. Ding, J. L. Zhao, *Analyst*, 2012, **137**, 70-72.
- 15 Z. Q. Hu, C. S. Lin, X. M. Wang, and L. Ding, et al., *Chem. Commun.*, 2010, **46**, 3765-3767.
- 16 T. Li, S. J. Dong, E. K. Wang, *J. Am. Chem. Soc.*, 2010, **132**, 13156-13157.
- 17 Y. Xiang, A. J. Tong, Y. Lu, *J. Am. Chem. Soc.*, 2009, **131**, 15352-15357.
- 18 A. K. Tyagi, J. S. Ramkumar, and O. D. Jayakumar, *Analyst*, 2012,**137**, 760-764.
- 19 Z. Q. Yuan, M. H. Peng, Y. He, E. S. Yeung, *Chem. Commun.*, 2011, 47, 11981-11983.
- 20 B. Wang, B. Luo, M. H. Liang, and A. Wang, et al., *Nanoscale*, 2011, **3**, 5059-5066.
- 21 9 D. D. Nie, H. Y. Wu, and Q. S. Zheng, et al., *Chem. Commun.*, 2012, **48**,1150-1152.
- 22 Y. Wang, J. Wang, F. Yang, X. R Yang, *Microchim Acta*, 2010, **171**,195-201.

**Table S2** The effects of different foreign ions on the determination of  $\text{Pb}^{2+}$  with the BCB-AuNPs system<sup>a</sup>

| Coexisting ions                       | multiples of $\text{Pb}^{2+}$ | Variation of fluorescence intensity (%) |
|---------------------------------------|-------------------------------|-----------------------------------------|
| $\text{Al}^{3+}$ , $\text{Cl}^-$      | 100                           | 1.9                                     |
| $\text{Ca}^{2+}$ , $\text{Cl}^-$      | 100                           | 2.9                                     |
| $\text{Co}^{2+}$ , $\text{Cl}^-$      | 100                           | 4.1                                     |
| $\text{Cr}^{2+}$ , $\text{SO}_4^{2-}$ | 50                            | 4                                       |
| $\text{Cu}^{2+}$ , $\text{SO}_4^{2-}$ | 50                            | 1.6                                     |
| $\text{Cd}^{2+}$ , $\text{SO}_4^{2-}$ | 50                            | 0.3                                     |
| $\text{K}^+$ , $\text{Cl}^-$          | 500                           | -1.0                                    |
| $\text{Mg}^{2+}$ , $\text{SO}_4^{2-}$ | 50                            | 3                                       |
| $\text{Mn}^{2+}$ , $\text{SO}_4^{2-}$ | 50                            | 4.1                                     |
| $\text{Na}^+$ , $\text{Cl}^-$         | 500                           | -2                                      |
| $\text{Zn}^{2+}$ , $\text{AC}^-$      | 50                            | 5.2                                     |
| $\text{Fe}^{3+}$ , $\text{Cl}^-$      | 10                            | 4.9                                     |

<sup>a</sup>Concentration of  $\text{Pb}^{2+}$ : 5.0 nM. Other conditions are the same as those described in the procedure.
